# Supplementary material for: Structural Equation Modeling for Analyzing Erythrocyte Fatty Acids in Framingham
Source: Hindawi journal article supplement (doi:10.1155/2014/160520), 2014-01-01
Supplement: f2 [file 160520.f2.pdf]

TABLE 2: RBC Fatty Acid Correlations ( $N = 3196$ ).

|          | Saturated |         |         |       | Monounsaturated |       |       |       | Trans  |         |        |         | Omega-3 Polyunsaturated |         |         |         | Omega-6 Polyunsaturated |       |         |         |       |       |
|----------|-----------|---------|---------|-------|-----------------|-------|-------|-------|--------|---------|--------|---------|-------------------------|---------|---------|---------|-------------------------|-------|---------|---------|-------|-------|
|          | C14:0     | C16:0   | C18:0   | C24:0 | C16:1           | C18:1 | C20:1 | C24:1 | C16:1t | C18:1t  | C18:2t | C18:3   | C20:5                   | C22:5   | C22:6   | C18:2   | C18:3                   | C20:2 | C20:3   | C20:4   | C22:4 | C22:5 |
| C14:0    | 1.0       | —       | —       | —     | —               | —     | —     | —     | —      | —       | —      | —       | —                       | —       | —       | —       | —                       | —     | —       | —       | —     | —     |
| C16:0    | 0.49**    | 1.0     | —       | —     | —               | —     | —     | —     | —      | —       | —      | —       | —                       | —       | —       | —       | —                       | —     | —       | —       | —     | —     |
| C18:0    | -0.36**   | -0.51** | 1.0     | —     | —               | —     | —     | —     | —      | —       | —      | —       | —                       | —       | —       | —       | —                       | —     | —       | —       | —     | —     |
| C24:0    | -0.16     | -0.28   | -0.16   | 1.0   | —               | —     | —     | —     | —      | —       | —      | —       | —                       | —       | —       | —       | —                       | —     | —       | —       | —     | —     |
| C16:1    | 0.59**    | 0.66*** | -0.56** | -0.10 | 1.0             | —     | —     | —     | —      | —       | —      | —       | —                       | —       | —       | —       | —                       | —     | —       | —       | —     | —     |
| C18:1    | 0.11      | 0.20    | -0.38** | 0.08  | 0.32**          | 1.0   | —     | —     | —      | —       | —      | —       | —                       | —       | —       | —       | —                       | —     | —       | —       | —     | —     |
| C20:1†   | -0.17     | -0.18   | -0.07   | 0.13  | -0.05           | 0.15  | 1.0   | —     | —      | —       | —      | —       | —                       | —       | —       | —       | —                       | —     | —       | —       | —     | —     |
| C24:1    | -0.16     | -0.36** | -0.05   | 0.84* | -0.18           | -0.01 | 0.04  | 1.0   | —      | —       | —      | —       | —                       | —       | —       | —       | —                       | —     | —       | —       | —     | —     |
| C16:1t   | 0.12      | -0.28   | -0.04   | -0.06 | -0.12           | -0.03 | 0.03  | -0.05 | 1.0    | —       | —      | —       | —                       | —       | —       | —       | —                       | —     | —       | —       | —     | —     |
| C18:1t   | -0.07     | -0.38** | -0.05   | -0.18 | -0.19           | -0.06 | 0.00  | -0.10 | 0.45** | 1.0     | —      | —       | —                       | —       | —       | —       | —                       | —     | —       | —       | —     | —     |
| C18:2t   | 0.21      | -0.04   | -0.17   | -0.15 | 0.14            | 0.06  | -0.11 | -0.12 | 0.42** | 0.58**  | 1.0    | —       | —                       | —       | —       | —       | —                       | —     | —       | —       | —     | —     |
| C18:3n3† | 0.26      | 0.14    | -0.20   | 0.03  | 0.13            | 0.00  | -0.20 | 0.03  | -0.01  | -0.01   | 0.12   | 1.0     | —                       | —       | —       | —       | —                       | —     | —       | —       | —     | —     |
| C20:5n3† | 0.12      | 0.24    | -0.08   | 0.05  | 0.09            | 0.02  | -0.06 | 0.00  | -0.08  | -0.34** | -0.19  | 0.15    | 1.0                     | —       | —       | —       | —                       | —     | —       | —       | —     | —     |
| C22:5n3  | 0.00      | 0.00    | 0.17    | -0.03 | -0.13           | -0.09 | -0.07 | -0.03 | -0.02  | -0.13   | -0.16  | 0.01    | 0.64***                 | 1.0     | —       | —       | —                       | —     | —       | —       | —     | —     |
| C22:6n3  | -0.15     | 0.00    | 0.03    | 0.15  | -0.18           | -0.08 | -0.02 | 0.08  | -0.07  | -0.26   | -0.25  | -0.02   | 0.70***                 | 0.41**  | 1.0     | —       | —                       | —     | —       | —       | —     | —     |
| C18:2n6  | 0.13      | -0.02   | -0.26   | -0.06 | 0.00            | -0.16 | 0.06  | -0.03 | 0.13   | 0.12    | 0.14   | 0.35**  | -0.14                   | -0.32** | -0.25   | 1.0     | —                       | —     | —       | —       | —     | —     |
| C18:3n6† | 0.30**    | 0.25    | -0.29   | -0.04 | 0.38**          | 0.12  | -0.10 | -0.02 | -0.04  | -0.03   | 0.12   | 0.08    | -0.01                   | -0.14   | -0.19   | 0.06    | 1.0                     | —     | —       | —       | —     | —     |
| C20:2n6  | -0.13     | -0.09   | -0.05   | 0.08  | -0.12           | -0.16 | 0.17  | -0.03 | -0.11  | 0.05    | 0.01   | 0.21    | -0.20                   | -0.17   | -0.07   | 0.45**  | -0.03                   | 1.0   | —       | —       | —     | —     |
| C20:3n6  | 0.19      | 0.12    | -0.11   | -0.02 | 0.23            | 0.03  | 0.02  | 0.00  | -0.01  | 0.03    | 0.16   | 0.10    | -0.20                   | -0.16   | -0.22   | 0.25    | 0.10                    | 0.24  | 1.0     | —       | —     | —     |
| C20:4n6  | -0.26     | -0.39** | 0.31**  | 0.12  | -0.24           | -0.27 | -0.04 | 0.18  | 0.00   | 0.07    | -0.10  | -0.32** | -0.44**                 | -0.21   | -0.33** | -0.47** | -0.04                   | -0.22 | -0.31** | 1.0     | —     | —     |
| C22:4n6  | -0.21     | -0.29   | 0.25    | -0.07 | -0.18           | -0.19 | 0.09  | -0.03 | 0.03   | 0.26    | 0.07   | -0.30** | -0.69***                | -0.25   | -0.59** | -0.24   | -0.02                   | 0.01  | -0.03   | 0.58**  | 1.0   | —     |
| C22:5n6  | -0.05     | -0.20   | 0.05    | 0.05  | 0.01            | -0.09 | 0.06  | 0.08  | 0.06   | 0.24    | 0.11   | -0.24   | -0.70***                | -0.40** | -0.19   | -0.02   | -0.04                   | 0.15  | 0.50**  | 0.67*** | 1.0   | —     |

†Natural logarithm transformation; Cells are shaded by strength of simple correlation, \*\* $0.30 \leq |r| < 0.60$ , \*\*\* $0.60 \leq |r| < 0.80$ , \* $0.80 \leq |r|$ .
