# Supplementary material for: Structural Equation Modeling for Analyzing Erythrocyte Fatty Acids in Framingham
Source: Hindawi journal article supplement (doi:10.1155/2014/160520), 2014-01-01
Supplement: f3 [file 160520.f3.pdf]

TABLE 3: Model M3 for Men.

| Fatty Acids                                  | Quartimin Rotated Factor Loadings |          |          | Residual Variances |
|----------------------------------------------|-----------------------------------|----------|----------|--------------------|
|                                              | PUFA                              | SAT      | TRANS    |                    |
| Ln(C18:3n3)                                  | -0.187**                          | 0.167**  | 0.170**  | 0.855              |
| Ln(C20:5n3)                                  | -0.824**                          | 0.023    | -0.119   | 0.254              |
| C22:6n3                                      | -0.751**                          | -0.305** | -0.147   | 0.373              |
| C20:4n6                                      | 0.601**                           | -0.290** | -0.218** | 0.495              |
| C22:4n6                                      | 0.854**                           | -0.102   | -0.062   | 0.253              |
| C22:5n6                                      | 0.789**                           | 0.024    | -0.022   | 0.392              |
| C14:0                                        | -0.014                            | 0.557**  | 0.075    | 0.532              |
| C16:0                                        | -0.104                            | 0.775**  | -0.186** | 0.267              |
| C18:0                                        | 0.088                             | -0.545** | -0.216** | 0.551              |
| C16:1                                        | 0.116                             | 0.787**  | -0.064   | 0.261              |
| C16:1t                                       | -0.067                            | -0.148   | 0.534**  | 0.653              |
| C18:1t                                       | 0.078                             | -0.186** | 0.824**  | 0.282              |
| C18:2t                                       | -0.006                            | 0.158**  | 0.734**  | 0.414              |
| Factor                                       | Factor Correlations               |          |          |                    |
| SAT                                          | -0.106                            | 1        | ...      |                    |
| TRANS                                        | 0.198                             | -0.075   | 1        |                    |
| Extracted Cumulative Proportion of Variances |                                   |          |          |                    |
| Common                                       | 0.26                              | 0.43     | 0.55     |                    |
| Total                                        | 0.29                              | 0.49     | 0.64     |                    |

\*\* loadings &gt;0.15.
