# Supplementary material for: Structural Equation Modeling for Analyzing Erythrocyte Fatty Acids in Framingham
Source: Hindawi journal article supplement (doi:10.1155/2014/160520), 2014-01-01
Supplement: f4 [file 160520.f4.pdf]

TABLE 4: Model M3 for Women.

| Fatty Acids                                  | Quartimin Rotated Factor Loadings |          |          | Residual Variances |
|----------------------------------------------|-----------------------------------|----------|----------|--------------------|
|                                              | PUFA                              | SAT      | TRANS    |                    |
| Ln(C18:3n3)                                  | -0.281**                          | 0.190**  | 0.175**  | 0.855              |
| Ln(C20:5n3)                                  | -0.839**                          | -0.024   | -0.096   | 0.254              |
| C22:6n3                                      | -0.740**                          | -0.258** | -0.114   | 0.373              |
| C20:4n6                                      | 0.605**                           | -0.322** | -0.194** | 0.495              |
| C22:4n6                                      | 0.801**                           | -0.145   | -0.042   | 0.253              |
| C22:5n6                                      | 0.772**                           | 0.040    | 0.012    | 0.392              |
| C14:0                                        | -0.040                            | 0.684**  | 0.178**  | 0.532              |
| C16:0                                        | -0.060                            | 0.822**  | -0.262** | 0.267              |
| C18:0                                        | 0.080                             | -0.686** | -0.168** | 0.551              |
| C16:1                                        | 0.081                             | 0.882**  | -0.016   | 0.261              |
| C16:1t                                       | -0.107                            | -0.137   | 0.621**  | 0.653              |
| C18:1t                                       | 0.136                             | -0.182** | 0.757**  | 0.282              |
| C18:2t                                       | 0.039                             | 0.182**  | 0.749**  | 0.414              |
| Factor                                       | Factor Correlations               |          |          |                    |
| SAT                                          | -0.198                            | 1        | ...      |                    |
| TRANS                                        | 0.232                             | 0.030    | 1        |                    |
| Extracted Cumulative Proportion of Variances |                                   |          |          |                    |
| Common                                       | 0.28                              | 0.46     | 0.57     |                    |
| Total                                        | 0.31                              | 0.52     | 0.66     |                    |

\*\*loadings &gt;0.15.
