# Supplementary material for: Structural Equation Modeling for Analyzing Erythrocyte Fatty Acids in Framingham
Source: Hindawi journal article supplement (doi:10.1155/2014/160520), 2014-01-01
Supplement: f6 [file 160520.f6.pdf]

TABLE 6: Structural Equation Model M6 Factor Loadings,  $\Lambda$ .

| Fatty Acids | Men                         |        |        | Women  |        |        |
|-------------|-----------------------------|--------|--------|--------|--------|--------|
|             | PUFA                        | SAT    | TRANS  | PUFA   | SAT    | TRANS  |
| Ln(C18:3n3) | -0.251                      | 0.142  | 0.069  | -0.364 | 0.154  | 0.113  |
| Ln(C20:5n3) | -0.838                      | 0      | 0      | -0.834 | 0      | 0      |
| C22:6n3     | -0.812                      | -0.382 | 0      | -0.803 | -0.347 | 0      |
| C20:4n6     | 0.631                       | -0.286 | -0.209 | 0.661  | -0.284 | -0.197 |
| C22:4n6     | 0.846                       | 0      | 0      | 0.822  | 0      | 0      |
| C22:5n6     | 0.815                       | 0      | 0      | 0.797  | 0      | 0      |
| C14:0       | 0                           | 0.635  | 0.055  | 0      | 0.782  | 0.106  |
| C16:0       | 0                           | 0.736  | -0.227 | 0      | 0.792  | -0.288 |
| C18:0       | 0                           | -0.495 | -0.016 | 0      | -0.654 | 0.063  |
| C16:1       | 0                           | 0.718  | 0      | 0      | 0.805  | 0      |
| C16:1t      | 0                           | 0      | 0.496  | 0      | 0      | 0.538  |
| C18:1t      | 0                           | -0.121 | 0.890  | 0      | -0.178 | 0.846  |
| C18:2t      | 0                           | 0.243  | 0.723  | 0      | 0.232  | 0.736  |
| Factor      | Factor Correlations, $\Psi$ |        |        |        |        |        |
| SAT         | -0.186                      | 1      | ...    | -0.255 | 1      | ...    |
| TRANS       | 0.317                       | -0.151 | 1      | 0.380  | 0.013  | 1      |
