# Supplementary material for: Structural Equation Modeling for Analyzing Erythrocyte Fatty Acids in Framingham
Source: Hindawi journal article supplement (doi:10.1155/2014/160520), 2014-01-01
Supplement: f7 [file 160520.f7.pdf]

TABLE 7: Structural Equation Model M6 Fatty Acid Residuals Matrix,  $\Theta$ .

|             | Ln<br>C18:3n3 | Ln<br>C20:5n3 | C22:6n3 | C20:4n6 | C22:4n6 | C22:5n6 | C14:0    | C16:0    | C18:0    | C16:1    | C16:1t   | C18:1t   | C18:2t   |
|-------------|---------------|---------------|---------|---------|---------|---------|----------|----------|----------|----------|----------|----------|----------|
| Ln(C18:3n3) | 0.834         | -0.114*       | -0.209* | 0       | 0       | 0       | 0        | 0        | 0        | 0        | 0        | 0        | 0        |
| Ln(C20:5n3) | -0.114*       | 0.294         | 0.089** | 0.073*  | 0       | 0       | 0        | 0        | 0        | 0        | 0        | 0        | 0        |
| C22:6n3     | -0.209*       | 0.089**       | 0.372   | 0       | 0.142*  | 0       | 0        | 0        | 0        | 0        | 0        | 0        | 0        |
| C20:4n6     | 0             | 0.073*        | 0       | 0.469   | 0       | 0       | 0        | 0        | 0        | 0        | 0        | 0        | 0        |
| C22:4n6     | 0             | 0             | 0       | 0       | 0.275   | -0.020* | 0        | 0        | 0        | 0        | 0        | 0        | 0        |
| C22:5n6     | 0             | 0             | 0.142*  | 0       | -0.020* | 0.343   | 0        | 0        | 0        | 0        | 0        | 0        | 0        |
| C14:0       | 0             | 0             | 0       | 0       | 0       | 0       | 0.434    | -0.054** | 0.080**  | 0        | 0.087**  | 0        | 0        |
| C16:0       | 0             | 0             | 0       | 0       | 0       | 0       | -0.054** | 0.321    | -0.045** | 0.054**  | -0.120** | 0        | 0.003**  |
| C18:0       | 0             | 0             | 0       | 0       | 0       | 0       | 0.080**  | -0.045** | 0.654    | -0.107** | -0.065** | -0.198** | -0.074** |
| C16:1       | 0             | 0             | 0       | 0       | 0       | 0       | 0        | 0.054**  | -0.107** | 0.369    | -0.104** | 0        | 0        |
| C16:1t      | 0             | 0             | 0       | 0       | 0       | 0       | 0.087**  | -0.120** | -0.065** | -0.104** | 0.722    | 0        | 0        |
| C18:1t      | 0             | 0             | 0       | 0       | 0       | 0       | 0        | 0        | -0.198** | 0        | 0        | 0.213    | 0        |
| C18:2t      | 0             | 0             | 0       | 0       | 0       | 0       | 0        | 0.003**  | -0.074** | 0        | 0        | 0        | 0.429    |

\*\* indicates dietary intake-related covariances; \* indicates biosynthesis-related covariances; Fatty acid residual variances are shown on the main diagonal.
